# Supplementary material
Source: PubMed Central journal article supplement (PMC4838599)
Supplement: NIHMS624849-supplement-supplemental.pdf [file NIHMS624849-supplement-supplemental.pdf]

Image set examples used in Vö and Wolfe

## Consistent Control

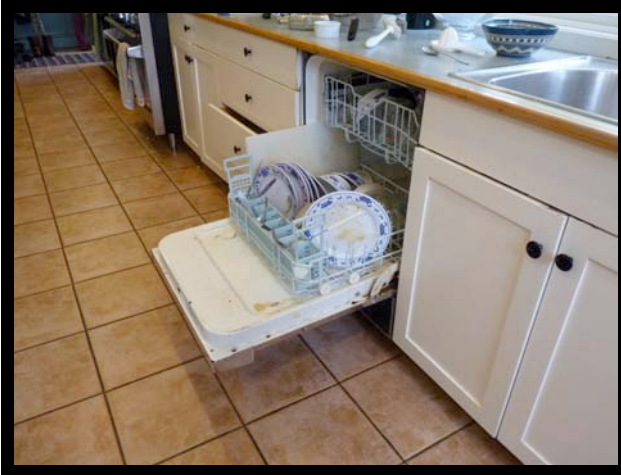

plate in dishwasher

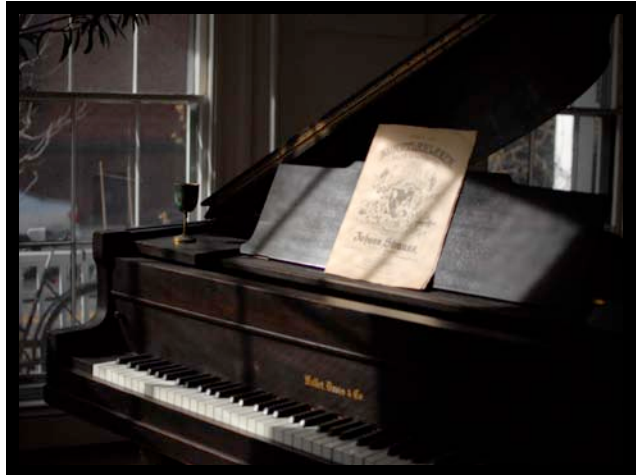

goblet on piano

## Semantic

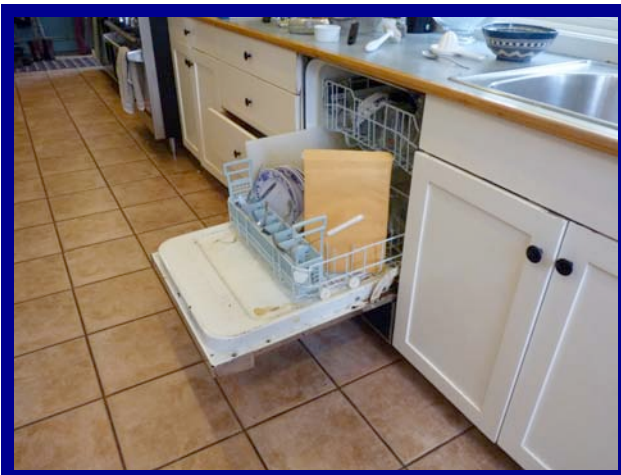

envelope in dishwasher

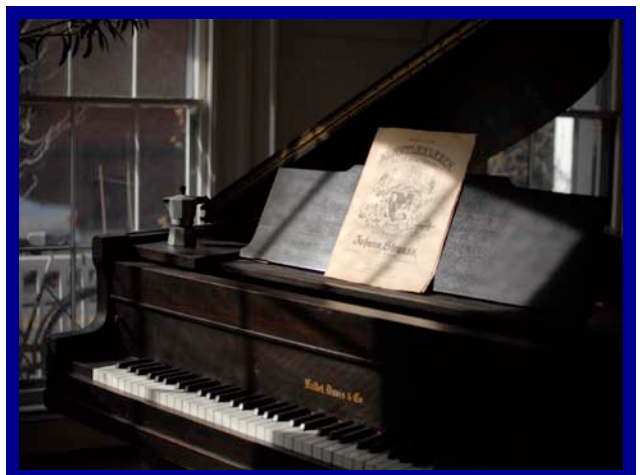

espresso machine on piano

## Syntax-Mislocated

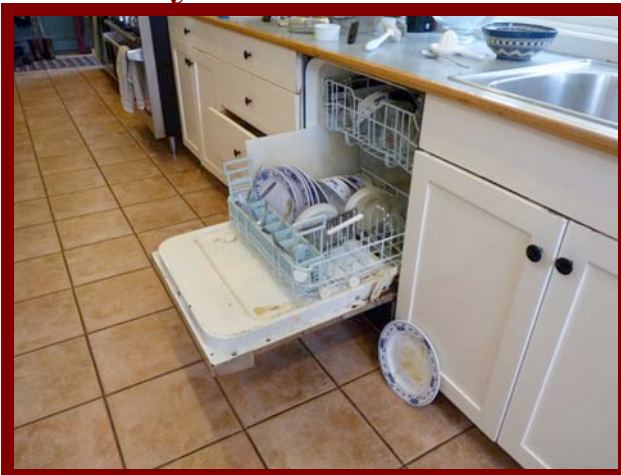

plate next to dishwasher

## Syntax-Physics

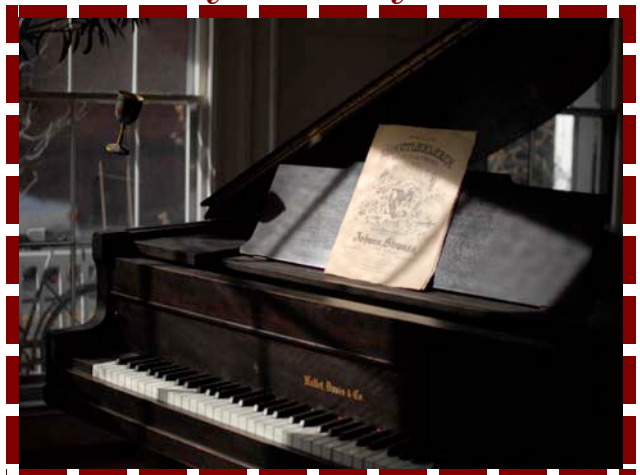

goblet floating over piano

Note: Each participant only saw one version of each image in the experiment

Image set examples used in Vö and Wolfe

## Consistent Control

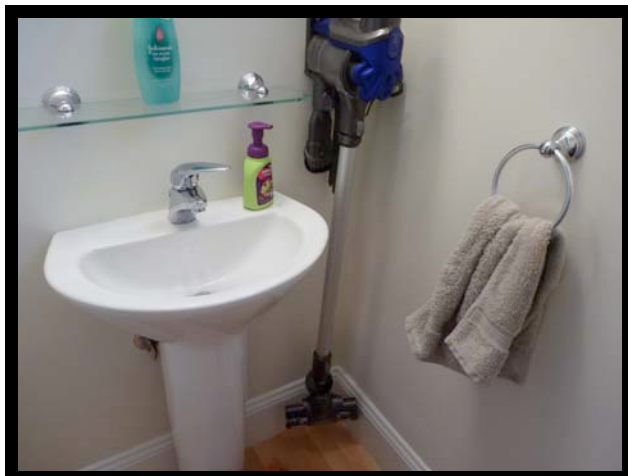

towell near sink

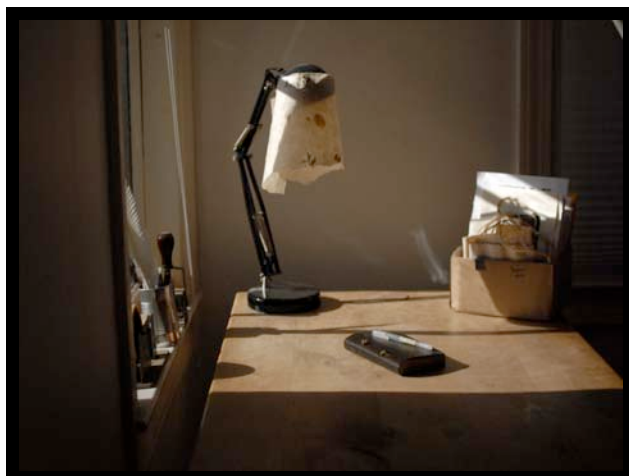

pen on desk

## Semantic

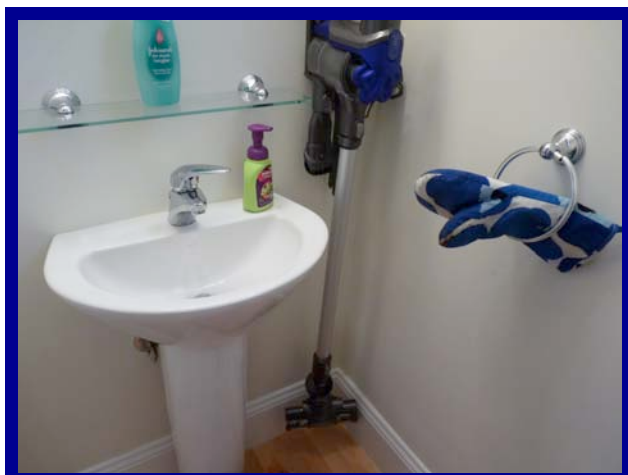

oven mitten near sink

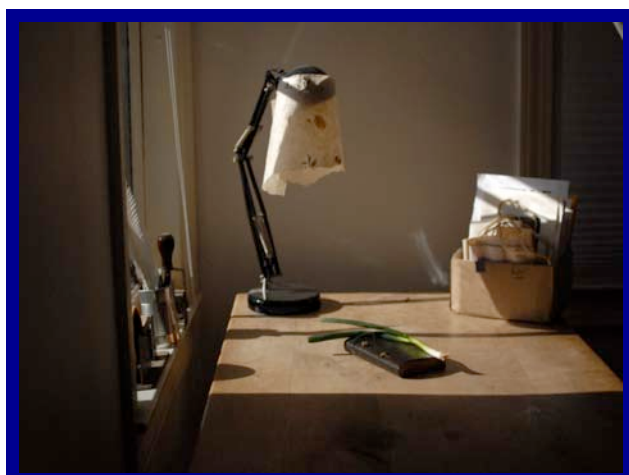

spring onion on desk

## Syntax-Mislocated

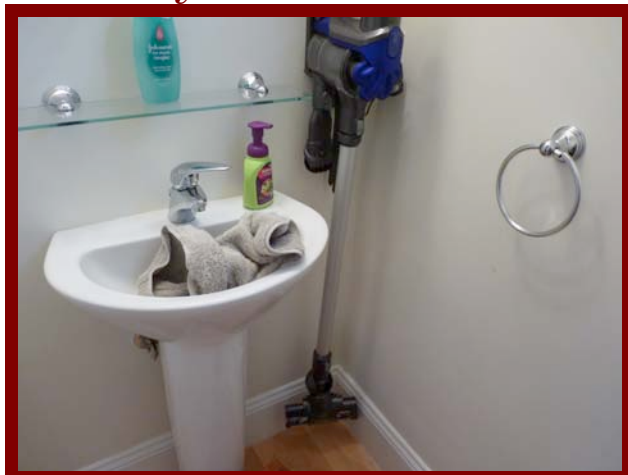

towell in sink

## Syntax-Physics

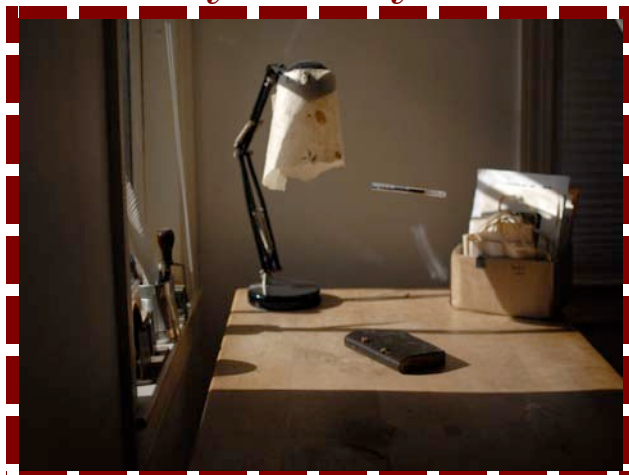

pen floating over desk

Note: Each participant only saw one version of each image in the experiment



Image set examples used in Vö and Wolfe

## Consistent Control

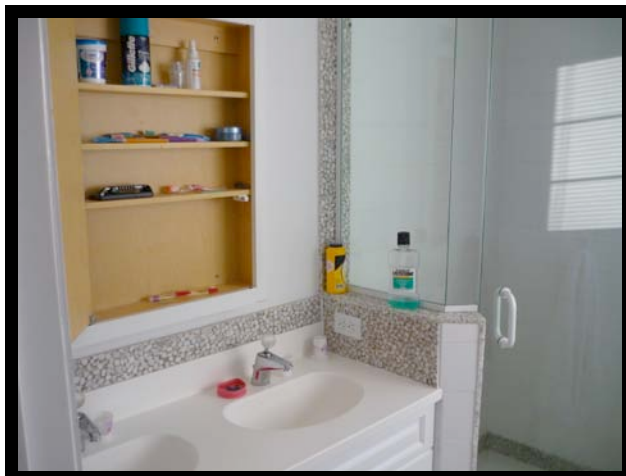

mouthwash near sink

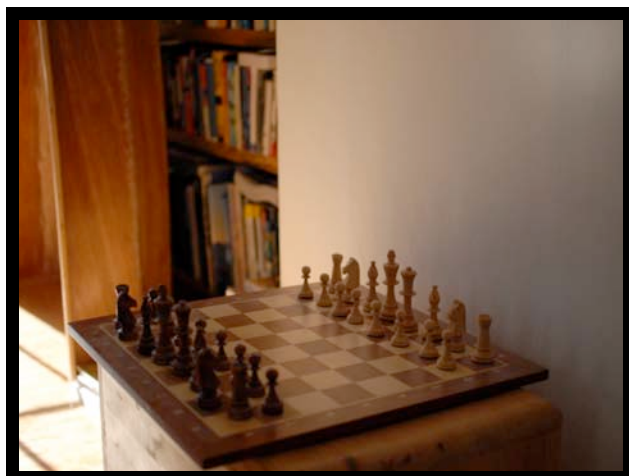

chess piece on chessboard

## Semantic

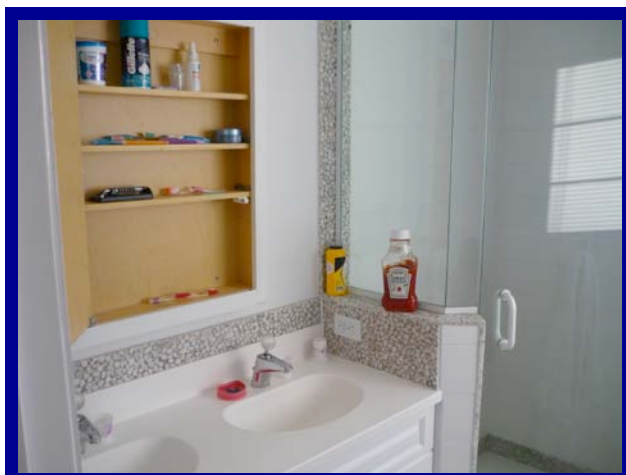

ketchup near sink

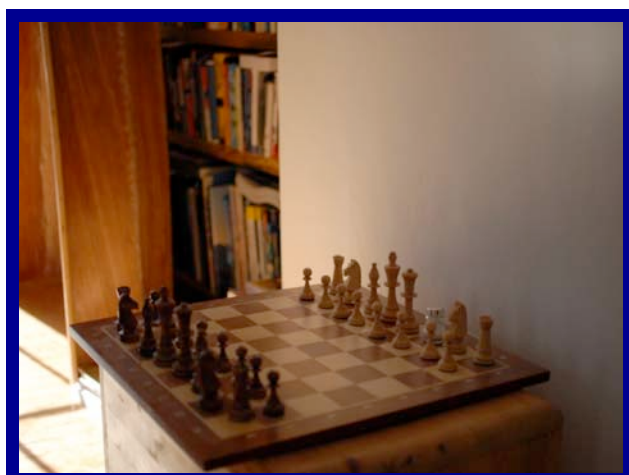

salt shaker on chessboard

## Syntax-Mislocated

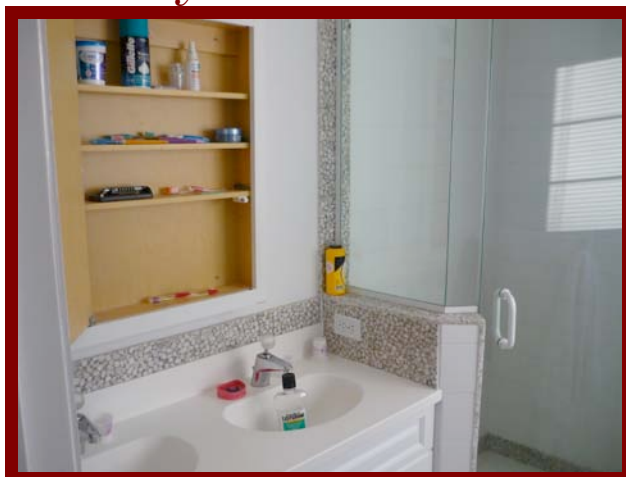

mouthwash in sink

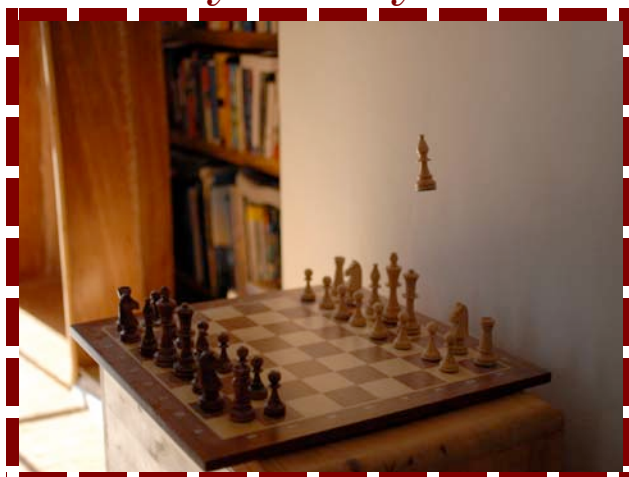

chess piece floating over chessboard

Note: Each participant only saw one version of each image in the experiment

Image set examples used in Vö and Wolfe

## Consistent Control

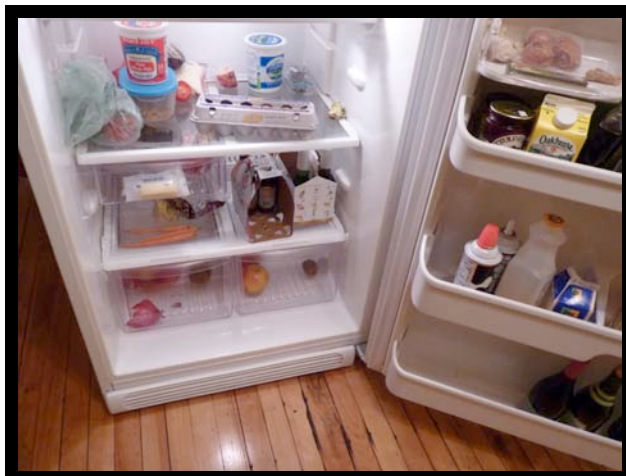

eggs in fridge

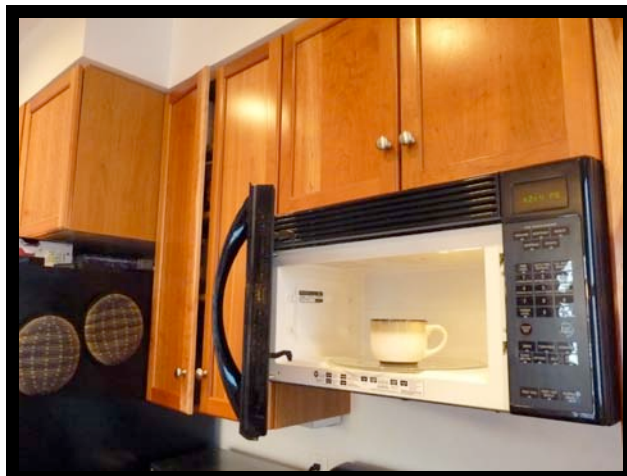

mug in microwave

## Semantic

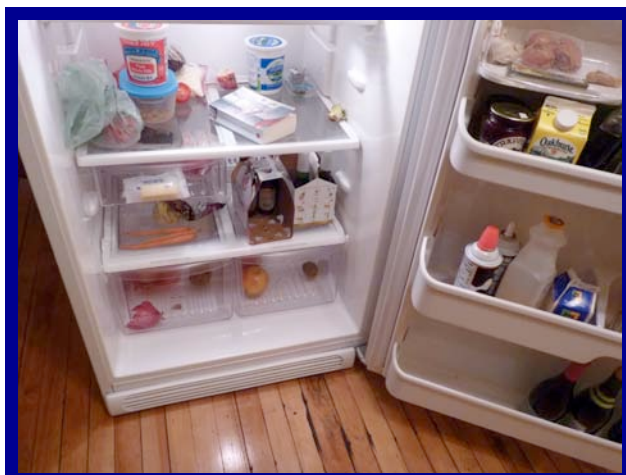

book in fridge

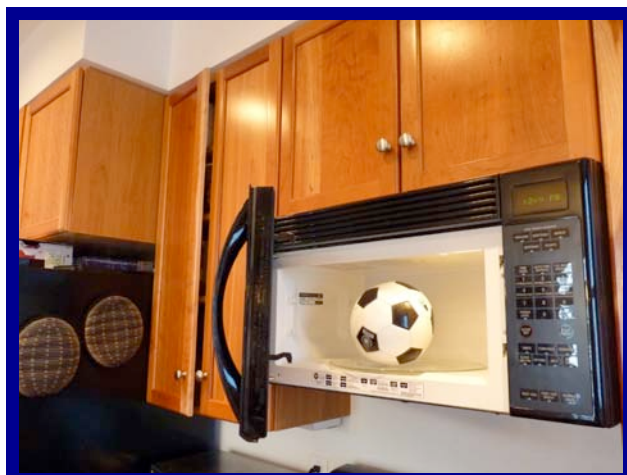

soccer ball in microwave

## Syntax-Mislocated

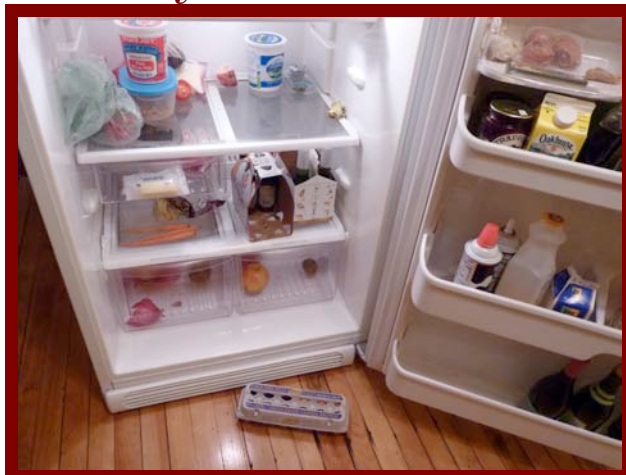

eggs on floor

## Syntax-Physics

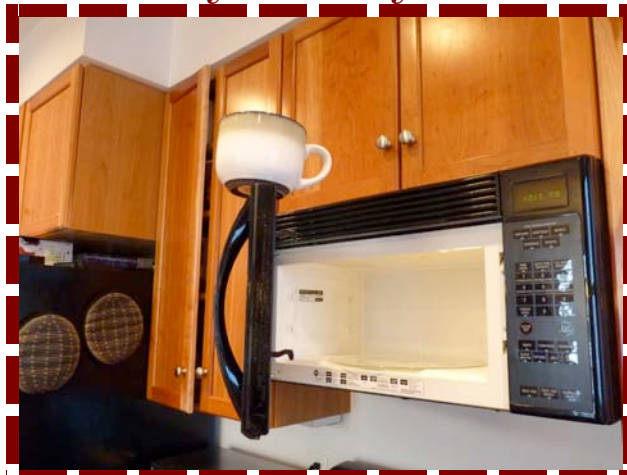

mug balancing on microwave door

Note: Each participant only saw one version of each image in the experiment



## Consistent Control

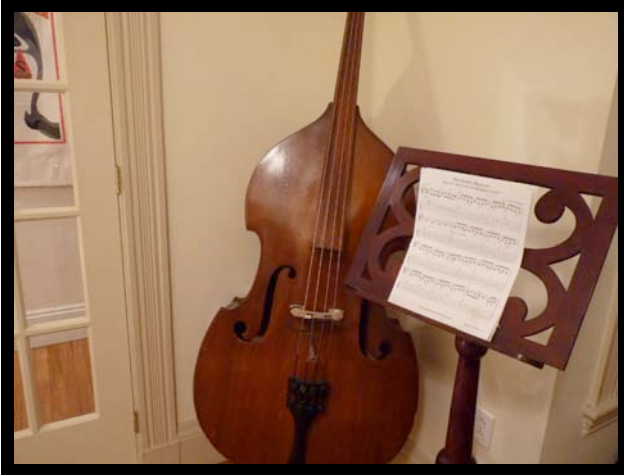

sheet music on stand

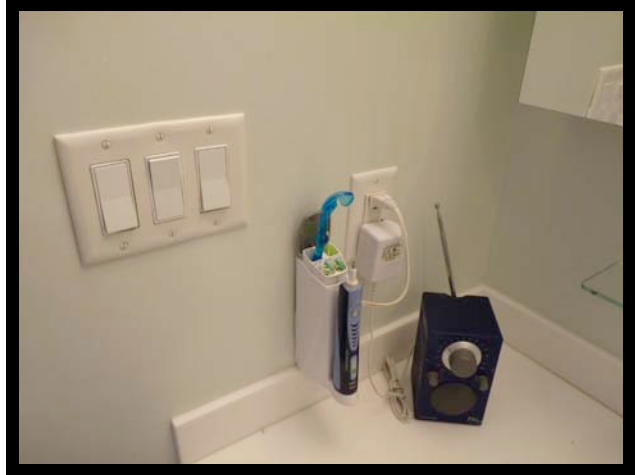

electric toothbrush in bathroom

## Semantic

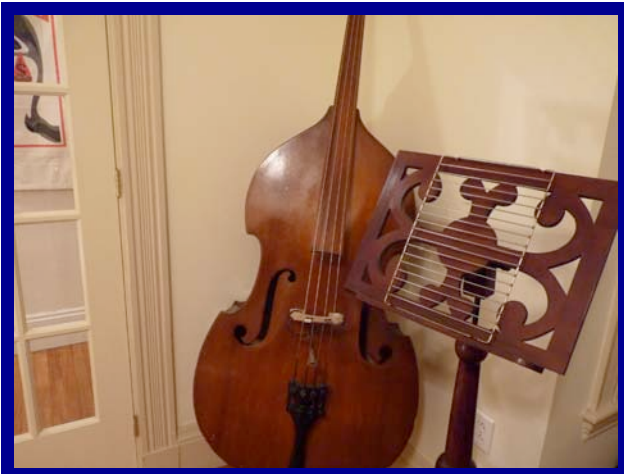

oven grid on stand

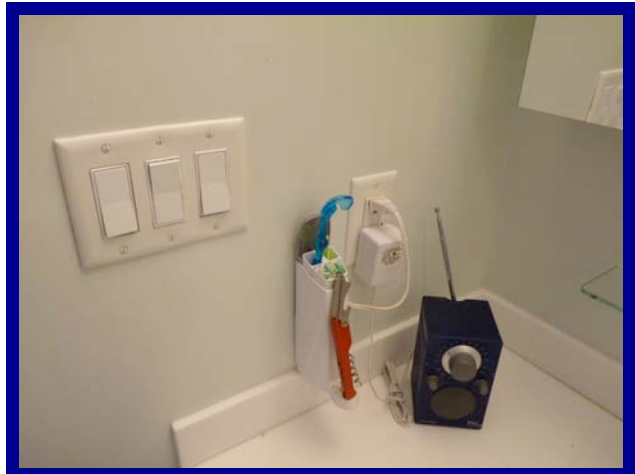

swiss army knife in bathroom

## Syntax-Mislocated

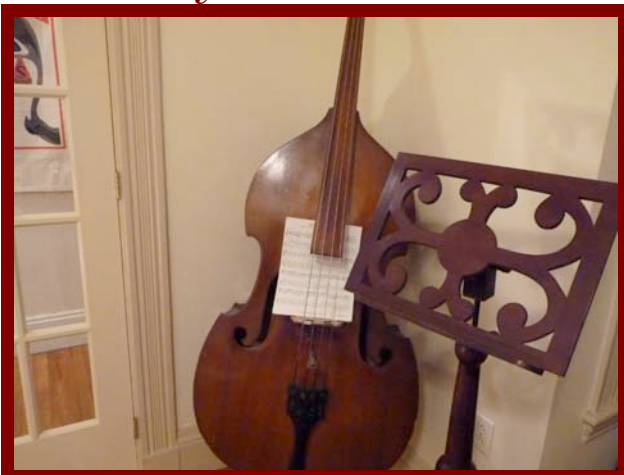

sheet music underneath bass strings

## Syntax-Physics

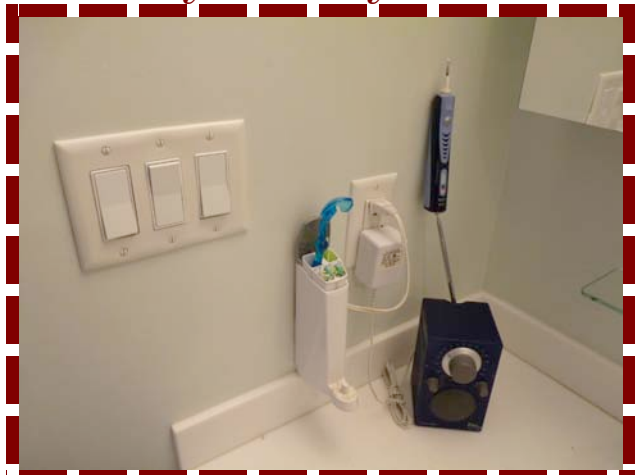

electric toothbrush balancing on antenna

Note: Each participant only saw one version of each image in the experiment
